# Supplementary material for: Cancer chemoprevention with dietary phytochemicals
Source: Springer Nature journal article supplement (doi:10.1038/nrc1189), 2003-11-24
Supplement: 41568_2003_BFnrc1189_MOESM1_ESM.pdf [file 41568_2003_BFnrc1189_MOESM1_ESM.pdf]

Online table 1 | **Selected examples of phytochemicals with chemopreventive potential**

| Phytochemical       | Biological effects                                                                                                                         | Molecular target effects                                                                                                                                                                                                        | Animal model/cell types                                                                                                                                                                    | References                             |
|---------------------|--------------------------------------------------------------------------------------------------------------------------------------------|---------------------------------------------------------------------------------------------------------------------------------------------------------------------------------------------------------------------------------|--------------------------------------------------------------------------------------------------------------------------------------------------------------------------------------------|----------------------------------------|
| <b>Curcumin</b>     |                                                                                                                                            |                                                                                                                                                                                                                                 |                                                                                                                                                                                            |                                        |
|                     | Inhibition of carcinogen activation and DNA binding                                                                                        | ↓ CYP1A1 activity; DMBA–DNA adduct formation<br>↓ Cyp1a1 activity<br>↓ Cyp1a1/1a2 activity                                                                                                                                      | Human breast cancer (MCF-7) cells treated with DMBA<br>Mouse liver<br>Rat liver                                                                                                            | 1<br>2<br>3                            |
|                     | Stimulation of carcinogen detoxification                                                                                                   | ↑ Gst activity<br>↑ Qr activity<br>↑ Gst and Eh activity<br>↑ GCL expression and NRF2 nuclear translocation                                                                                                                     | Rat liver<br>Mouse hepatoma (Hepa 1c1c7) cells<br>Mouse liver<br>Human bronchial epithelial (HBE1) cells                                                                                   | 4<br>5<br>2<br>6                       |
|                     | Control of cell cycle and proliferation                                                                                                    | ↓ Cyclin D1 expression and RB phosphorylation<br>↓ <i>EGR1</i> , <i>c-MYC</i> , <i>BCL-X<sub>L</sub></i> , and <i>TP53</i> mRNA expression;<br>↓ NF-κB activation<br>↓ c-Jun and c-Fos expression                               | Prostate, breast, squamous carcinoma cells<br>B-cell lymphoma<br>Mouse epidermal (JB6) cells; TPA-treated mouse skin                                                                       | 7<br>8<br>9                            |
|                     | Induction of apoptosis and/or differentiation                                                                                              | ↓ NF-κB and IKK activity, phosphorylation of IκBα;<br>↓ BCL2, BCL-X <sub>L</sub> , cyclin D1 and IL-6; ↑ caspase-7,9 activity<br>↑ p53 and BAX expression<br>↑ caspase-8,3 activity and BID cleavage;<br>↑ cytochrome c release | Human multiple myeloma cells<br>Human breast cancer cells<br>Human promyelocytic leukaemia (HL-60) cells                                                                                   | 10<br>11<br>12                         |
|                     | Inhibition of the activity of oncogene products                                                                                            | ↓ c-Myc, c-Fos and c-Jun expression                                                                                                                                                                                             | Mouse skin                                                                                                                                                                                 | 13                                     |
|                     | Inhibition of angiogenesis, metastasis and invasion                                                                                        | ↓ <i>MMP2</i> , <i>VEGF</i> and <i>FGF2</i> mRNA expression; ↑ <i>TIMP1</i> mRNA expression<br>↓ uPa expression and fibronectin synthesis<br>↓ MMP9 expression                                                                  | Human breast carcinoma (MDA-MB-231) cells<br>Mouse epidermal keratinocytes<br>Human hepatocellular (SK-HEP1) carcinoma cell                                                                | 14<br>15<br>16                         |
| <b>Capsaicin</b>    |                                                                                                                                            |                                                                                                                                                                                                                                 |                                                                                                                                                                                            |                                        |
|                     | Inhibition of carcinogen activation and DNA binding                                                                                        | ↓ Cyp2a2/3a1/2c11/2b1/2b2/2c6 activity<br>↓ Cyp2e1 activity                                                                                                                                                                     | Hamster and rat liver<br>Rat liver S-9                                                                                                                                                     | 17<br>18                               |
|                     | Stimulation of carcinogen detoxification                                                                                                   | ↑ Gst and Qr activity                                                                                                                                                                                                           | Rat tongue tumorigenesis model<br>Azoxymethane-induced rat rat colon tumour                                                                                                                | 19<br>20                               |
|                     | Downregulation of proliferation                                                                                                            | ↑ TAX degradation; ↓ BCL2 expression and NF-κB activity<br>↓ NF-κB activity and IL-8 expression<br>↓ Nf-κb and Ap1 activation<br>↓ Nf-κb and Ap1 DNA binding<br>↓ NADH oxidase activity<br>↑ PKC activity                       | Human T-cell leukaemia cells<br>Human malignant melanoma cells<br>Mouse skin <i>in vivo</i><br>HL-60 cells<br>HL-60 cells and ovarian carcinoma<br>Human and mouse melanoma<br>HL-60 cells | 21<br>22<br>23<br>24<br>25<br>26<br>27 |
|                     | Induction of apoptosis/cell-cycle arrest                                                                                                   | ↓ BCL2 expression;<br>↑ caspase-3 activity<br>↑ JNK activity and ROS<br>↑ JNK and p38 MAPK activity<br>↓ Mitochondrial permeability transition                                                                                  | SK-Hep-1 hepatocellular carcinoma cells<br>Jurkat cell<br>RAS-transformed human breast epithelial cells<br>Human squamous-cell carcinoma cells                                             | 28<br>29,30<br>31<br>32                |
|                     | Inhibition of angiogenesis, metastasis and invasion                                                                                        | ↑ HIF-1α activity and <i>VEGF</i> mRNA expression                                                                                                                                                                               | Human malignant melanoma cells                                                                                                                                                             | 33                                     |
| <b>[6]-Gingerol</b> |                                                                                                                                            |                                                                                                                                                                                                                                 |                                                                                                                                                                                            |                                        |
|                     | Inhibition of TPA-induced tumour promotion<br>Induction of apoptosis<br>Inhibition of cell transformation<br>Inhibition of lung metastasis | ↓ Odc activity<br>↓ Ap1 activation                                                                                                                                                                                              | ICR mouse skin<br>HL-60 cells<br>JB6 cells<br>Mouse bearing melanoma (B16) cells                                                                                                           | 34<br>35<br>36<br>37                   |

|                                                     |                                                                                                                                                                                 |                                                                                                    |  |       |
|-----------------------------------------------------|---------------------------------------------------------------------------------------------------------------------------------------------------------------------------------|----------------------------------------------------------------------------------------------------|--|-------|
| EGCG                                                |                                                                                                                                                                                 |                                                                                                    |  |       |
| Inhibition of carcinogen activation and DNA binding | ↓ CYP protein expression                                                                                                                                                        | Human hepatoma (HepG2) cells                                                                       |  | 38    |
|                                                     | ↓ NADPH-P450 reductase                                                                                                                                                          | Genetically engineered <i>Salmonella typhimurium</i> harbouring human CYP and NADPH-P450 reductase |  | 39    |
|                                                     | ↓ AHR binding to DNA;<br>↓ CYP1A1/2 mRNA expression                                                                                                                             | HepG2 cells                                                                                        |  | 40    |
| Control of cell cycle                               | ↑ p21, KIP1, p16 and p18 expression; ↓ cyclin D1 and CDK2,4,6 expression and activity                                                                                           | Human epidermoid carcinoma (A431) cells                                                            |  | 41    |
|                                                     | ↑ p21, KIP1, p16 and p18 expression; ↓ CDK2,4,6 expression; ↓ cyclin D1 and E protein expression;<br>↓ cyclin E binding to CDK2;<br>↑ binding of cyclin D1 towards p21 and KIP1 | Human prostate carcinoma                                                                           |  | 42,43 |
|                                                     | ↑ p21, p53 and KIP1 protein expression; ↓ CDK2,4 activity                                                                                                                       | MCF-7 cells                                                                                        |  | 44    |
| Control of proliferation                            | ↓ phosphorylation of Erk1/2, Mek1/2 and Elk1                                                                                                                                    | RAS-transformed JB6 cells                                                                          |  | 45    |
|                                                     | ↓ Cox2 and cyclin D1 expression; ↓ Pge <sub>2</sub> production                                                                                                                  | NMBA-treated F344 rats                                                                             |  | 46    |
|                                                     | ↓ Phosphorylation of ERBB2, AKT and GSK3α–GST                                                                                                                                   | ERBB2-overexpressing breast cancer cells                                                           |  | 47    |
|                                                     | ↓ ODC expression; ↓MAPK and tyrosine kinase activity                                                                                                                            | RAS-transformed (NIH-pATM) fibroblasts                                                             |  | 48    |
| Induction of apoptosis and/or differentiation       | ↓ Expression of BCL2 and cyclin D1; ↑ BAX, p21 and KIP1 expression;<br>↓ phosphorylation of EGFR, STAT3 and ERK                                                                 | Head and neck squamous carcinoma cells                                                             |  | 49    |
|                                                     | ↑ ROS formation and mitochondrial depolarization                                                                                                                                | Human prostate cancer (DU145) cells                                                                |  | 50    |
|                                                     | ↑ FAS/FASL activity;                                                                                                                                                            | HepG2 cells                                                                                        |  | 51    |
|                                                     | ↑ Expression of p53 and p21                                                                                                                                                     | A431 cells                                                                                         |  | 52    |
|                                                     | ↓ E2F level and RB phosphorylation                                                                                                                                              | A431 cells                                                                                         |  | 50,54 |
|                                                     | ↓ NF-κB expression/activation<br>↑ Caspase-3 activity                                                                                                                           | Human cervical squamous carcinoma (HeLa) cells<br>HepG2 cells                                      |  | 54    |
| Inhibition of oncogene expression/activity          | ↓ <i>Pkc</i> and <i>c-Myc</i> expression                                                                                                                                        | TPA-treated mouse skin                                                                             |  | 55    |
| Inhibition of angiogenesis, metastasis and invasion | ↓ VEGF expression                                                                                                                                                               | Human colon cancer cells                                                                           |  | 56    |
|                                                     | ↓ VEGF binding to receptor                                                                                                                                                      | Human umbilical-vein endothelial cells                                                             |  | 57    |
|                                                     | ↓ MMP activity                                                                                                                                                                  | Human umbilical-vein endothelial cells                                                             |  | 58    |
|                                                     | ↓ NF-κB, and STAT activity;                                                                                                                                                     | Human head and neck and breast carcinoma cells                                                     |  | 59    |
|                                                     | ↓ VEGF production<br>↓ VE-cadherin phosphorylation; ↓ AKT activity                                                                                                              | Human microvascular endothelial cells                                                              |  | 60    |
|                                                     | ↓ MMP2,9 and gelatinase activity                                                                                                                                                | Human neuroblastoma and fibrosarcoma cells                                                         |  | 61    |
| Genistein                                           |                                                                                                                                                                                 |                                                                                                    |  |       |
| Inhibition of carcinogen activation and DNA binding | ↓ DBP–DNA adduct formation                                                                                                                                                      | MCF-7 cells                                                                                        |  | 62    |
|                                                     | ↓ CYP3A4 mRNA level                                                                                                                                                             | Human colon carcinoma (Caco-2) cells                                                               |  | 63    |
|                                                     | ↓ CYP27b1 expression                                                                                                                                                            | C57BL/6 mouse colon                                                                                |  | 64    |
| Stimulation of carcinogen detoxification            | ↑ QR mRNA expression and activity                                                                                                                                               | Human colon cancer (Colo205) cells                                                                 |  | 65    |
|                                                     | ↑ GPX mRNA expression and activity                                                                                                                                              | Human prostate (LNCap, PC-3) cancer cells                                                          |  | 66    |
| Control of cell cycle and proliferation             | ↑ Phosphorylation of ATM, p53 and CHK2                                                                                                                                          | Lymphoblastoid cells                                                                               |  | 67    |
|                                                     | ↓ c-FOS expression; ↓ AP1 and ERK activity                                                                                                                                      | Human breast cancer (MCF-7, MDA-MB-231, etc.) cells                                                |  | 68    |
|                                                     | ↑ p21 and KIP1 protein and mRNA expression                                                                                                                                      | LNCap cells                                                                                        |  | 69    |

|                                                     |                                                                                         |                                                       |          |
|-----------------------------------------------------|-----------------------------------------------------------------------------------------|-------------------------------------------------------|----------|
|                                                     | ↓ CDK1 activity                                                                         | Human choroidal melanoma (OCM-1) cells                | 70       |
| Induction of apoptosis and/or differentiation       | ↓ BCL2 expression                                                                       | MCF-7 cells                                           | 71       |
|                                                     | ↓ NF-κB and AKT activity                                                                | PC3 cells                                             | 72       |
|                                                     | ↑ Cytochrome c release                                                                  | Breast cancer (MDA-MB-231) cells                      | 73       |
|                                                     | ↑ BAX and CDKN2A expression; ↓ BCL2 and ERBB2 expression                                | Human and rat pancreatic tumour cells                 | 74       |
|                                                     | ↑ BAK; ↓ BCL-X <sub>L</sub> expression                                                  | ERBB2-expressing human breast epithelial cells        | 75       |
|                                                     | ↑ BAX expression, cytochrome c release and caspase-3 activity; ↓ proteasome activity    | MCF-7 cells<br>p815 mastocytoma cells                 | 76<br>77 |
| Inhibition of the activity of oncogene product      | ↓ N-Myc expression and Ptk activity                                                     | Mouse neuroblastoma (N2a) cells                       | 78       |
|                                                     | ↓ uPA activity; ↑ PAI activity; ↓ PA/PAI ratio                                          | N-MYC-transfected neuroblastoma cells                 | 79       |
| Modulation of hormonal and growth-factor activity   | ↓ Prostate androgen-regulated transcript-1                                              | LNCaP cells                                           | 80       |
|                                                     | ↓ pS2, TGF-β and ER expression                                                          | Human breast (MCF7, T47D, etc.) carcinoma cells       | 81       |
|                                                     | ↑ <i>BRCA2</i> mRNA                                                                     | MDA-MB-231 cells                                      | 82       |
|                                                     | ↓ Cancer-cell growth by environmental oestrogens                                        | MCF-7 cells, T47D MDA-MB-231 cells                    | 83       |
|                                                     | ↓ Androgen and oestrogen-receptor expression                                            | Rat prostate                                          | 84       |
|                                                     | ↓ NF-κB DNA-binding activity by HGF                                                     | HepG2 cells                                           | 85       |
| Inhibition of angiogenesis, metastasis and invasion | ↓ MMP3,9 activity                                                                       | Malignant mesothelioma cells                          | 86       |
|                                                     | ↓ uPA and MMP-9/2 production                                                            | Ovarian cancer cells                                  | 87       |
|                                                     | ↓ <i>VEGF</i> and <i>FGF</i> mRNA expression                                            | Human renal-cell carcinoma cells                      | 88       |
| Resveratrol                                         |                                                                                         |                                                       |          |
| Inhibition of carcinogen activation and DNA binding | ↓ Cyp1a activity;                                                                       | Hepa1c1c7 cells                                       | 89       |
|                                                     | ↓ Expression and activity of CYP1A1/1A2;                                                | Human hepatoma and breast cancer cells                | 90       |
|                                                     | ↓ O-acetyltransferase activity;                                                         | MCF-7 cells                                           | 91       |
|                                                     | ↓ PhIP-DNA adduct formation                                                             |                                                       |          |
| Stimulation of carcinogen detoxification            | ↑ Qr activity                                                                           | Hepa1c1c7 cells                                       | 89       |
| Control of cell proliferation                       | ↓ NF-κB activation                                                                      | MCF-7 cells                                           | 92       |
|                                                     | ↓ Cox2 and Mmp9 expression                                                              | Rat mammary carcinogenesis model                      | 92       |
|                                                     | ↓ Cox expression and Pge <sub>2</sub> production                                        | NMBA-induced rat esophageal tumour                    | 93       |
|                                                     | ↓ PKC and ERK1 activity; ↓ COX2 mRNA level and AP1 activity                             | Human mammary and oral epithelial cells               | 94,95    |
| Control of cell cycle                               | ↑ p21 expression;                                                                       | A431 cells                                            | 96,97    |
|                                                     | ↓ cyclin D1, D2, E expression;                                                          |                                                       |          |
|                                                     | ↓ CDK2/4/6 expression and activity;                                                     |                                                       |          |
|                                                     | ↓ RB phosphorylation and E2F expression                                                 |                                                       |          |
|                                                     | ↓ Cyclin B1, D1, A1 and β-catenin expression                                            | Human colon carcinoma (SW480) cells                   | 98       |
|                                                     | ↓ Cyclin D1 and CDK4 expression; ↓ RB phosphorylation                                   | Human colon adenocarcinoma (Caco-2 and HCT-116) cells | 99       |
| Induction of apoptosis and/or differentiation       | ↓ NF-κB activity;                                                                       | Human pancreatic cancer cells                         | 74       |
|                                                     | ↑ cytochrome c release and caspase-3 activation                                         |                                                       |          |
|                                                     | ↓ Lipid peroxidation, MAPK and JNK activity; ↓ NF-κB and AP1 activity; ↓ ROS generation | Human myeloid, lymphoid and epithelial cells          | 100      |
|                                                     | ↓ BCL2 expression                                                                       | HL-60 cells                                           | 101      |
|                                                     | ↑ Expression of BAX, p21 and p53                                                        | HepG2 cells                                           | 102      |
|                                                     | ↓ BCL2 expression; ↑ BAX expression                                                     | Oesophageal (EC-9706) cancer cells                    | 103      |
|                                                     | ↓ IκB kinase activity and NF-κB activation                                              | Rat-1 cells expressing oncogenic <i>Hras</i>          | 104      |

|                   |                                                                                                      |                                                                                                                                               |                                                   |         |
|-------------------|------------------------------------------------------------------------------------------------------|-----------------------------------------------------------------------------------------------------------------------------------------------|---------------------------------------------------|---------|
|                   | Co-localization of BAX with mitochondria; ↑ caspase-3,9 activity; ↓ mitochondrial membrane potential | Human colon cancer (HCT-116) cells                                                                                                            | 105                                               |         |
|                   | ↑ Caspase-9 activity                                                                                 | HL-60 cells                                                                                                                                   | 106                                               |         |
|                   | ↑ Mapks activation and p53 phosphorylation                                                           | JB6 cells                                                                                                                                     | 107,108                                           |         |
|                   | ↑ Phosphorylation of ERK1,2, ELK1 and p53                                                            | Human prostate (DU145) cells                                                                                                                  | 109                                               |         |
|                   | ↑ Expression of CD11a, CD11b, CD18, CD54; ↑ superoxide production                                    | Human myeloid leukaemia cells                                                                                                                 | 110                                               |         |
|                   | ↑ Expression of 53, p21, p300/CBP and APAF1                                                          | LNCaP cells                                                                                                                                   | 111                                               |         |
|                   | Inhibition of angiogenesis, metastasis and invasion                                                  | ↓ DNA synthesis; ↓ binding of Vegf to Huvec                                                                                                   | Mice bearing Lewis cell carcinoma                 | 112     |
| CAPE              |                                                                                                      |                                                                                                                                               |                                                   |         |
|                   | Stimulation of carcinogen detoxification                                                             | ↑ Expression of NQO1 and GST Ya mediated via ARE element                                                                                      | HepG2 cells                                       | 113     |
|                   | Control of cell proliferation                                                                        | ↓ ODC protein and mRNA expression; ↓ PKC activity; ↓ EGF binding and EGF receptor phosphorylation                                             | SV40 transformed human keratinocytes              | 114     |
|                   |                                                                                                      | ↓ β-Catenin expression                                                                                                                        | <i>Apc</i> mutated (C57BL/6J-Min/+) mouse         | 115     |
|                   | Induction of apoptosis                                                                               | ↑ Caspase-3 activity and BAX expression; ↓ BCL2 expression                                                                                    | HL-60 cells                                       | 116     |
|                   |                                                                                                      | ↑ Caspase-3 activity                                                                                                                          | p53 mutant human lung and ovarian carcinoma cells | 117     |
|                   |                                                                                                      | ↓ Mitochondrial membrane potential and GSH                                                                                                    | HL-60 cells                                       | 118     |
|                   |                                                                                                      | ↓ GSH levels                                                                                                                                  | Adenovirus transformed rat embryo fibroblasts     | 119     |
|                   | Inhibition of angiogenesis, metastasis and invasion                                                  | ↓ Phosphorylation of focal adhesion kinase and p130Cas                                                                                        | Human colon carcinoma cells                       | 120     |
|                   | Miscellaneous (including antioxidant gene expression)                                                | ↓ Nrf2-Keap1 complex; ↑ Nrf2 DNA binding; ↑ Ho-1 expression and activity                                                                      | Porcine renal epithelial cells                    | 121     |
| Indole-3-carbinol |                                                                                                      |                                                                                                                                               |                                                   |         |
|                   | Inhibition of carcinogen activation and DNA binding                                                  | ↓ DNA adduct formation                                                                                                                        | PhIP- and IQ-induced rat mammary tumour           | 122     |
|                   |                                                                                                      |                                                                                                                                               | PhIP-induced rat colon carcinogenesis model       | 123     |
|                   | Stimulation of carcinogen detoxification                                                             | ↑ Gstt1-1 protein and mRNA expression                                                                                                         | Dihaloalkane-treated rat liver                    | 124     |
|                   |                                                                                                      | ↑ <i>Cyp1a1/1b1/2b1/2b2</i> mRNA transcription and activity                                                                                   | Oestrogen-treated female rats                     | 125     |
|                   | Control of cell cycle and proliferation                                                              | ↓ Oestrogen receptor phosphorylation                                                                                                          | Oestrogen-responsive human breast cancer cells    | 126     |
|                   |                                                                                                      | ↑ p21 and KIP1 protein expression; ↓ CDK6 protein expression and activity; ↓ RB phosphorylation                                               | PC-3 cells                                        | 127     |
|                   | Induction of apoptosis                                                                               | ↑ BAX expression; ↓ BCL2 expression; ↓ AKT phosphorylation and activity; ↓ BCL-X <sub>L</sub> , BAD expression and NF-κB DNA-binding activity | PC-3 cells                                        | 127,128 |
|                   |                                                                                                      | ↓ NF-κB DNA binding; AKT activation                                                                                                           | MDA-MB-468, LNCaP cells                           | 129     |
|                   | Modulation of hormonal and growth-factor activity                                                    | ↓ ER-α signalling; ↑ BRCA1 expression                                                                                                         | MCF-7, T-47D and MDA-MB-468 cells                 | 130,131 |
|                   | Inhibition of angiogenesis, metastasis and invasion                                                  | ↑ Protein expression of E-cadherin, α-, β- and γ-catenin                                                                                      | MCF-7 and MDA-MB-468 cells                        | 131     |
|                   |                                                                                                      | ↓ PTEN expression                                                                                                                             | T-47D cells                                       | 132     |

Diallyl sulphide

|                                                     |                                                                          |                                                                                       |     |
|-----------------------------------------------------|--------------------------------------------------------------------------|---------------------------------------------------------------------------------------|-----|
| Inhibition of carcinogen activation and DNA binding | ↓ P450 2e1 activity                                                      | Rat liver S-9 fraction                                                                | 18  |
| Stimulation of carcinogen detoxification            | ↑ Qr and Gst activity                                                    | Wistar rats tumorigenesis model                                                       | 133 |
|                                                     |                                                                          | Sprague-Dawley rat tissues                                                            | 134 |
|                                                     | ↑ Prod and Gst activity; ↑ expression of Cyp1a1/2b1/3a1 mRNA and protein | Ethacrynic-acid-treated rat liver                                                     | 135 |
|                                                     | ↑ Activity of Gst, Gpx and Gr                                            | t-Butyl-hydroperoxide and H <sub>2</sub> O <sub>2</sub> -treated mouse stomach tissue | 136 |
| Induction of apoptosis                              | ↑ p53 and BAX expression; ↓ BCL2 expression                              | Non-small-cell lung cancer (H460 & H1299) cells                                       | 137 |
| Inhibition of angiogenesis,                         |                                                                          | Ehrlich ascite tumour-bearing Swiss albino mice                                       | 138 |

Lycopene

|                                                    |                                                             |                                                        |         |
|----------------------------------------------------|-------------------------------------------------------------|--------------------------------------------------------|---------|
| Inhibition of carcinogen activation and DNA damage | ↓ 8-OHdG formation                                          | Human prostate cancer tissue                           | 139     |
| Stimulation of carcinogen detoxification           | ↑ Gsh, Gst, Gpx and Gr activity                             | DMBA-induced hamster buccal pouch carcinogenesis model | 140,141 |
|                                                    | ↑ Gsh, Gst, Gpx and GR                                      | MMNG-induced rat gastric carcinogenesis model          | 142     |
|                                                    | ↑ Gsh, Sod and Gpx activity                                 | Female Wistar rats                                     | 143     |
| Control of cell cycle and apoptosis                | ↓ Cyclin D1,D3 expression and CDK2,4 activity;              | Human breast and endometrial cancer cells              | 144     |
|                                                    | ↓ retention of KIP1 in cyclin-E-CDK2 complex                |                                                        |         |
|                                                    | ↓ Tyrosine phosphorylation of insulin receptor substrate-1; | MCF-7 cells                                            | 145     |
|                                                    | ↓ AP1 DNA binding; ↑ IGF-binding protein                    |                                                        |         |
|                                                    | ↓ Proliferation                                             | MCF-7,MDA-MB-231 cells                                 | 146     |
|                                                    | ↑ Apoptosis                                                 | HL-60 cells                                            | 147     |

Sulphoraphane

|                                                     |                                                               |                                           |     |
|-----------------------------------------------------|---------------------------------------------------------------|-------------------------------------------|-----|
| Inhibition of carcinogen activation and DNA binding | ↓ Cyp2e1 activity                                             | Rat liver microsomes                      | 148 |
| Stimulation of carcinogen detoxification            | ↑ GST and QR protein expression;                              | Human mammary epithelial (MCF-10F) cells  | 149 |
|                                                     | ↓ DNA adduct                                                  | Human colon adenocarcinoma (LS-174) cells | 150 |
|                                                     | ↑ NQO1 and AKR1C1 protein and mRNA expression                 | Rat liver, colon and pancreas             | 151 |
|                                                     | ↑ Qr and Gst activity                                         |                                           |     |
| Induction of apoptosis and cell-cycle arrest        | ↓ Androgen receptors, PSA production and cyclin-D1 expression | LNCaP cells                               | 152 |
|                                                     | ↑ Cyclin A,B and BAX expression; ↑ cytochrome c release       | Human colon cancer (HT29) cells           | 153 |

AHR, aryl hydrocarbon receptor; APAF, apoptotic protease-activating factor; Apc, adenomatosis polyposis coli; ARE, antioxidant-response element; ATM, ataxia telangiectasia mutated; BAD, BCL2-antagonist of cell death; BAK, BCL2-homologous antagonist/killer; B[a]P, benzo[a]pyrene; BAX, BCL2-associated X protein; BCL2, B-cell CLL/lymphoma 2; BID, BH3-interacting domain death agonist; BRCA, breast cancer; CBP, cyclic AMP response element binding protein; CDC, cell-division cycle; CDK, cyclin-dependent kinase; CHK2, checkpoint 2; COX2, cyclooxygenase 2; CYP, cytochrome p450; DBP, dibenzo[a,h]pyrene; DMBA, 7,12-dimethylbenz[*a*]anthracene; EGCG, epigallocatechin gallate; EGR1, early growth response 1; EH, epoxide hydrolase; ER, oestrogen receptor; ERBB2, v-erb-b2 erythroblastic leukaemia viral oncogene homologue 2; ERK, extracellular-signal-regulated kinase; FASL, FAS ligand; FGF, fibroblast growth factor; GCL, glutamate-cysteine ligase; GSH, reduced glutathione; GPX, glutathione peroxidase; GR, glutathione reductase; GSK3 $\alpha$ , glycogen synthase kinase-3 $\alpha$ ; GST, glutathione-S-transferase; HGF, hepatocyte growth factor; HIF-1 $\alpha$ , hypoxia-inducible factor-1 $\alpha$ ; HO-1, haem oxygenase-1; Huvec, human umbilical vein endothelial cells; IKK, I $\kappa$ B kinase; IL, interleukin; JNK, c-JUN NH<sub>2</sub>-terminal kinase; Keap1, Kelch-like ECH-associated protein-1; MAPK, mitogen-activated protein kinase; MEK, MAPK kinase; MMNG, N-methyl-N'-nitro-N-nitrosoguanidine; MMP, matrix metalloproteinase; NMBA, N-nitrosomethylbenzylamine; NQO1, NAD(P)H:quinone oxidoreductase 1; NRF2, NF-E2-related factor-2; Odc, ornithine decarboxylase; OhdG, 7,8-dihydro-8-oxo-2'-deoxyguanosine; PAI, plasminogen-activator inhibitor; PGE<sub>2</sub>, prostaglandin E2; PhIP, 2-amino-1-methyl-6-phenylimidazo[4,5-*b*]pyridine; PKC, protein kinase c; PROD, pentoxysorufin-O-dealkylase; PSA, prostate-specific antigen; PTEN, phosphatase and tensin homologue; PTK, protein tyrosine kinase; QR, quinone reductase; RB, retinoblastoma; ROS, reactive oxygen species; STAT3, signal transducer and activator of transcription 3; TGF- $\beta$ , transforming growth factor- $\beta$ ; TIMP1, tissue inhibitor of metalloproteinase 1; TPA, 12-O-tetradecanoylphorbol-13-acetate; uPA, urokinase plasminogen activator; VE, vascular endothelial cadherin; VEGF, vascular endothelial growth factor.

1. Ciolino, H. P., Daschner, P. J., Wang, T. T. & Yeh, G. C. Effect of curcumin on the aryl hydrocarbon receptor and cytochrome P450 1A1 in MCF-7 human breast carcinoma cells. *Biochem. Pharmacol.* **56**, 197–206 (1998).
2. Singh, S. V. *et al.* Mechanism of inhibition of benzo[*a*]pyrene-induced forestomach cancer in mice by dietary curcumin. *Carcinogenesis* **19**, 1357–1360 (1998).
3. Oetari, S., Sudibyo, M., Commandeur, J. N., Samhoedi, R. & Vermeulen, N. P. Effects of curcumin on cytochrome P450 and glutathione S-transferase activities in rat liver. *Biochem. Pharmacol.* **51**, 39–45 (1996).
4. Sharma, R. A. *et al.* Effects of dietary curcumin on glutathione S-transferase and malondialdehyde-DNA adducts in rat liver and colon mucosa: relationship with drug levels. *Clin. Cancer Res.* **7**, 1452–1458 (2001).
5. Dinkova-Kostova, A. T. & Talalay, P. Relation of structure of curcumin analogs to their potencies as inducers of Phase 2 detoxification enzymes. *Carcinogenesis* **20**, 911–914 (1999).
6. Dickinson, D. A., Iles, K. E., Zhang, H., Blank, V. & Forman, H. J. Curcumin alters EpRE and AP-1 binding complexes and elevates glutamate-cysteine ligase gene expression. *FASEB J.* **17**, 473–475 (2003).
7. Mukhopadhyay, A. *et al.* Curcumin-induced suppression of cell proliferation correlates with down-regulation of cyclin D1 expression and CDK4-mediated retinoblastoma protein phosphorylation. *Oncogene* **21**, 8852–8861 (2002).
8. Han, S. S., Chung, S. T., Robertson, D. A., Ranjan, D. & Bondada, S. Curcumin causes the growth arrest and apoptosis of B cell lymphoma by downregulation of *egr-1*, *c-myc*, *bcl-XL*, *NF- $\kappa$ B*, and *p53*. *Clin. Immunol.* **93**, 152–161 (1999).
9. Lu, Y. P. *et al.* Effect of curcumin on 12-O-tetradecanoylphorbol-13-acetate- and ultraviolet B light-induced expression of *c-Jun* and *c-Fos* in JB6 cells and in mouse epidermis. *Carcinogenesis* **15**, 2363–2370 (1994).
10. Bharti, A. C., Donato, N., Singh, S. & Aggarwal, B. B. Curcumin (diferuloylmethane) down-regulates the constitutive activation of nuclear factor- $\kappa$ B and I $\kappa$ B $\alpha$  kinase in human multiple myeloma cells, leading to suppression of proliferation and induction of apoptosis. *Blood* **101**, 1053–1062 (2003).
11. Choudhuri, T., Pal, S., Aggarwal, M. L., Das, T. & Sa, G. Curcumin induces apoptosis in human breast cancer cells through p53-dependent Bax induction. *FEBS Lett.* **512**, 334–340 (2002).
12. Anto, R. J., Mukhopadhyay, A., Denning, K. & Aggarwal, B. B. Curcumin (diferuloylmethane) induces apoptosis through activation of caspase-8, BID cleavage and cytochrome *c* release: its suppression by ectopic expression of *Bcl-2* and *Bcl-x<sub>L</sub>*. *Carcinogenesis* **23**, 143–150 (2002).
13. Kakar, S. S. & Roy, D. Curcumin inhibits TPA induced expression of *c-fos*, *c-jun* and *c-myc* proto-oncogenes messenger RNAs in mouse skin. *Cancer Lett.* **87**, 85–89 (1994).
14. Shao, Z. M. *et al.* Curcumin exerts multiple suppressive effects on human breast carcinoma cells. *Int. J. Cancer* **98**, 234–240 (2002).
15. Santibanez, J. F., Quintanilla, M. & Martinez, J. Genistein and curcumin block TGF- $\beta$  1-induced u-PA expression and migratory and invasive phenotype in mouse epidermal keratinocytes. *Nutr. Cancer* **37**, 49–54 (2000).
16. Lin, L. I., Ke, Y. F., Ko, Y. C. & Lin, J. K. Curcumin inhibits SK-Hep-1 hepatocellular carcinoma cell invasion *in vitro* and suppresses matrix metalloproteinase-9 secretion. *Oncology* **55**, 349–353 (1998).
17. Zhang, Z., Hamilton, S. M., Stewart, C., Strother, A. & Teel, R. W. Inhibition of liver microsomal cytochrome P450 activity and metabolism of the tobacco-specific nitrosamine NNK by capsaicin and ellagic acid. *Anticancer Res.* **13**, 2341–2346 (1993).
18. Surh, Y.-J. *et al.* Chemoprotective effects of capsaicin and diallyl sulfide against mutagenesis or tumorigenesis by vinyl carbamate and N-nitrosodimethylamin. *Carcinogenesis* **16**, 2467–2471 (1995).
19. Tanaka, T. *et al.* Modifying effects of dietary capsaicin and rotenone on 4-nitroquinoline 1-oxide-induced rat tongue carcinogenesis. *Carcinogenesis* **23**, 1361–1367 (2002).
20. Yoshitani, S. I., Tanaka, T., Kohno, H. & Takashima, S. Chemoprevention of azoxymethane-induced rat colon carcinogenesis by dietary capsaicin and rotenone. *Int. J. Oncol.* **19**, 929–939 (2001).
21. Zhang, J., Nagasaki, M., Tanaka, Y. & Morikawa, S. Capsaicin inhibits growth of adult T-cell leukemia cells. *Leuk. Res.* **27**, 275–283 (2003).
22. Patel, P. S., Varney, M. L., Dave, B. J. & Singh, R. K. Regulation of constitutive and induced NF- $\kappa$ B activation in malignant melanoma cells by capsaicin modulates interleukin-8 production and cell proliferation. *J. Interferon Cytokine Res.* **22**, 427–435 (2002).
23. Han, S. S. *et al.* Capsaicin suppresses phorbol ester-induced activation of NF- $\kappa$ B/Rel and AP-1 transcription factors in mouse epidermis. *Cancer Lett.* **164**, 119–126 (2001).
24. Han, S. S., Keum, Y. S., Chun, K. S. & Surh, Y. J. Suppression of phorbol ester-induced NF- $\kappa$ B activation by capsaicin in cultured human promyelocytic leukemia cells. *Arch. Pharm. Res.* **25**, 475–479 (2002).
25. Morre, D. J., Chueh, P. J. & Morre, D. M. Capsaicin inhibits preferentially the NADH oxidase and growth of transformed cells in culture. *Proc. Natl Acad. Sci. USA* **92**, 1831–1835 (1995).
26. Morre, D. J. *et al.* Capsaicin inhibits plasma membrane NADH oxidase and growth of human and mouse melanoma lines. *Eur. J. Cancer* **32A**, 1995–2003 (1996).
27. Kang, S. N., Chung, S. W. & Kim, T. S. Capsaicin potentiates 1,25-dihydroxyvitamin D<sub>3</sub>- and all-trans retinoic acid-induced differentiation of human promyelocytic leukemia HL-60 cells. *Eur. J. Pharmacol.* **420**, 83–90 (2001).
28. Jung, M. Y., Kang, H. J. & Moon, A. Capsaicin-induced apoptosis in SK-Hep-1 hepatocarcinoma cells involves Bcl-2 downregulation and caspase-3 activation. *Cancer Lett.* **165**, 139–145 (2001).
29. Macho, A., Blazquez, M. V., Navas, P. & Munoz, E. Induction of apoptosis by vanilloid compounds does not require *de novo* gene transcription and activator protein 1 activity. *Cell Growth Differ.* **9**, 277–286 (1998).
30. Macho, A. *et al.* Selective induction of apoptosis by capsaicin in transformed cells: the role of reactive oxygen species and calcium. *Cell Death Differ.* **6**, 155–165 (1999).
31. Kang, H. J. *et al.* Roles of JNK-1 and p38 in selective induction of apoptosis by capsaicin in *ras*-transformed human breast epithelial cells. *Int. J. Cancer* **103**, 475–482 (2003).
32. Hail, N. Jr & Lotan, R. Examining the role of mitochondrial respiration in vanilloid-induced apoptosis. *J. Natl Cancer Inst.* **94**, 1281–1292 (2002).
33. Patel, P. S., Yang, S., Li, A., Varney, M. L. & Singh, R. K. Capsaicin regulates vascular endothelial cell growth factor expression by modulation of hypoxia inducing factor-1 $\alpha$  in human malignant melanoma cells. *J. Cancer Res. Clin. Oncol.* **128**, 461–468 (2002).
34. Park, K. K., Chun, K. S., Lee, J. M., Lee, S. S. & Surh, Y. J. Inhibitory effects of [6]-gingerol, a major pungent principle of ginger, on phorbol ester-induced inflammation, epidermal ornithine decarboxylase activity and skin tumor promotion in ICR mice. *Cancer Lett.* **129**, 139–144 (1998).
35. Lee, E. & Surh, Y. J. Induction of apoptosis in HL-60 cells by pungent vanilloids, [6]-gingerol and [6]-paradol. *Cancer Lett.* **134**, 163–168 (1998).
36. Bode, A. M., Ma, W. Y., Surh, Y. J. & Dong, Z. Inhibition of epidermal growth factor-induced cell transformation and activator protein 1 activation by [6]-gingerol. *Cancer Res.* **61**, 850–853 (2001).
37. Suzuki, F., Kobayashi, M., Komatsu, Y., Kato, A. & Pollard, R. B. Keishi-ka-kei-to, a traditional Chinese herbal medicine, inhibits pulmonary metastasis of B16 melanoma. *Anticancer Res.* **17**, 873–878 (1997).
38. Allen, S. W., Mueller, L., Williams, S. N., Quattrochi, L. C. & Raucy, J. The use of a high-volume screening procedure to assess the effects of dietary flavonoids on human *cyp1a1* expression. *Drug Metab. Dispos.* **29**, 1074–1079 (2001).
39. Muto, S., Fujita, K., Yamazaki, Y. & Kamataki, T. Inhibition by green tea catechins of metabolic activation of procarcinogens by human cytochrome P450. *Mutat. Res.* **479**, 197–206 (2001).
40. Williams, S. N. *et al.* Comparative studies on the effects of green tea extracts and individual tea catechins on human CYP1A gene expression. *Chem. Biol. Interact.* **128**, 211–229 (2000).
41. Ahn, N., Cheng, P. & Mukhtar, H. Cell cycle dysregulation by green tea polyphenol epigallocatechin-3-gallate. *Biochem. Biophys. Res. Commun.* **275**, 328–334 (2000).
42. Gupta, S., Ahmad, N., Nieminen, A. L. & Mukhtar, H. Growth inhibition, cell-cycle dysregulation, and induction of apoptosis by green tea constituent (-)-epigallocatechin-3-gallate in androgen-sensitive and androgen-insensitive human prostate carcinoma cells. *Toxicol. Appl. Pharmacol.* **164**, 82–90 (2000).
43. Gupta, S., Hussain, T. & Mukhtar, H. Molecular pathway for (-)-epigallocatechin-3-gallate-induced cell cycle arrest and apoptosis of human prostate carcinoma cells. *Arch. Biochem. Biophys.* **410**, 177–185 (2003).
44. Liang, Y. C., Lin-Shiau, S. Y., Chen, C. F. & Lin, J. K. Inhibition of cyclin-dependent kinases 2 and 4 activities as well as induction of Cdk inhibitors p21 and p27 during growth arrest of human breast carcinoma cells by (-)-epigallocatechin-3-gallate. *J. Cell Biochem.* **75**, 1–12 (1999).
45. Chung, J. Y., Park, J. O., Phyu, H., Dong, Z. & Yang, C. S. Mechanisms of inhibition of the Ras-MAP kinase signaling pathway in 30.7b Ras 12 cells by tea polyphenols (-)-epigallocatechin-3-gallate and theaflavin-3,3'-digallate. *FASEB J.* **15**, 2022–2024 (2001).
46. Li, Z. G. *et al.* Inhibitory effects of epigallocatechin-3-gallate on N-nitrosomethylbenzylamine-induced esophageal tumorigenesis in F344 rats. *Int. J. Oncol.* **21**, 1275–1283 (2002).
47. Pianetti, S., Guo, S., Kavanagh, K. T. & Sonenshein, G. E. Green tea polyphenol epigallocatechin-3-gallate inhibits Her-2/neu signaling, proliferation, and transformed phenotype of breast cancer cells. *Cancer Res.* **62**, 652–655 (2002).
48. Wang, Y. C. & Bachrach, U. The specific anti-cancer activity of green tea (-)-epigallocatechin-3-gallate (EGCG). *Amino Acids* **22**, 131–143 (2002).
49. Masuda, M., Suzuki, M. & Weinstein, I. B. Effects of epigallocatechin-3-gallate on growth, epidermal growth factor receptor signaling pathways, gene expression, and chemosensitivity in human head and neck squamous cell carcinoma cell lines. *Clin. Cancer Res.* **7**, 4220–4229 (2001).
50. Chung, L. Y. *et al.* Induction of apoptosis by green tea catechins in human prostate cancer DU145 cells. *Life Sci.* **68**, 1207–1214 (2001).
51. Kuo, P. L. & Lin, C. C. Green Tea Constituent (-)-Epigallocatechin-3-Gallate Inhibits Hep G2 Cell Proliferation and Induces Apoptosis through p53-Dependent and Fas-Mediated Pathways. *J. Biomed. Sci.* **10**, 219–227 (2003).
52. Ahmad, N., Adhami, V. M., Gupta, S., Cheng, P. & Mukhtar, H. Role of the retinoblastoma (pRb)-E2F/DP pathway in cancer chemopreventive effects of green tea polyphenol epigallocatechin-3-gallate. *Arch. Biochem. Biophys.* **398**, 125–131 (2002).
53. Ahmad, N., Gupta, S. & Mukhtar, H. Green tea polyphenol epigallocatechin-3-gallate differentially modulates nuclear factor  $\kappa$ B in cancer cells versus normal cells. *Arch. Biochem. Biophys.* **376**, 338–346 (2000).
54. Chen, C., Yu, R., Uwour, E. D. & Kong, A. N. Activation of antioxidant-response element (ARE), mitogen-activated protein kinases (MAPKs) and caspases by major green tea polyphenol components during cell survival and death. *Arch. Pharm. Res.* **23**, 605–612 (2000).
55. Hu, G., Han, C. & Chen, J. Inhibition of oncogene expression by green tea and (-)-epigallocatechin gallate in mice. *Nutr. Cancer* **24**, 203–209 (1995).
56. Jung, Y. D. *et al.* EGCG, a major component of green tea, inhibits tumour growth by inhibiting VEGF induction in human colon carcinoma cells. *Br. J. Cancer* **84**, 844–850 (2001).
57. Kondo, T., Ohta, T., Igura, K., Hara, Y. & Kajii, K. Tea catechins inhibit angiogenesis *in vitro*, measured by human endothelial cell growth, migration and tube formation, through inhibition of VEGF receptor binding. *Cancer Lett.* **180**, 139–144 (2002).
58. Singh, A. K. *et al.* Green tea constituent epigallocatechin-3-gallate inhibits angiogenic differentiation of human endothelial cells. *Arch. Biochem. Biophys.* **401**, 29–37 (2002).
59. Masuda, M. *et al.* Epigallocatechin-3-gallate decreases VEGF production in head and neck and breast carcinoma cells by inhibiting EGFR-related pathways of signal transduction. *J. Exp. Ther. Oncol.* **2**, 350–359 (2002).
60. Tang, F. Y., Nguyen, N. & Meydani, M. Green tea catechins inhibit VEGF-induced angiogenesis *in vitro* through suppression of VE-cadherin phosphorylation and inactivation of Akt molecule. *Int. J. Cancer* **106**, 871–878 (2003).
61. Garbisa, S. *et al.* Tumor gelatinases and invasion inhibited by the green tea flavanol epigallocatechin-3-gallate. *Cancer* **91**, 822–832 (2001).
62. Smith, W. A., Freeman, J. W. & Gupta, R. C. Effect of chemopreventive agents on DNA adduction induced by the potent mammary carcinogen dibenzo[*a,h*]pyrene in the human breast cells MCF-7. *Mutat. Res.* **480–481**, 97–108 (2001).
63. Hara, H., Yasunami, Y. & Adachi, T. Alteration of cellular phosphorylation state affects vitamin D receptor-mediated CYP3A4 mRNA induction in Caco-2 cells. *Biochem. Biophys. Res. Commun.* **296**, 182–188 (2002).
64. Kallay, E. *et al.* Phytoestrogens regulate vitamin D metabolism in the mouse colon: relevance for colon tumor prevention and therapy. *J. Nutr.* **132**, 3490S–3493S (2002).
65. Wang, W., Liu, L. Q., Higuchi, C. M. & Chen, H. Induction of NADPH:quinone reductase by dietary phytoestrogens in colonic Colo205 cells. *Biochem. Pharmacol.* **56**, 189–195 (1998).
66. Suzuki, K. *et al.* Genistein, a soy isoflavone, induces glutathione peroxidase in the human prostate cancer cell

- lines LNCaP and PC-3. *Int. J. Cancer* **99**, 846–852 (2002).
67. Ye, R. *et al.* The plant isoflavonoid genistein activates p53 and Chk2 in an ATM-dependent manner. *J. Biol. Chem.* **276**, 4828–4833 (2001).
68. Dampier, K. *et al.* Differences between human breast cell lines in susceptibility towards growth inhibition by genistein. *Br. J. Cancer* **85**, 618–624 (2001).
69. Shen, J. C. *et al.* Low-dose genistein induces cyclin-dependent kinase inhibitors and G(1) cell-cycle arrest in human prostate cancer cells. *Mol. Carcinog.* **29**, 92–102 (2000).
70. Casagrande, F. & Darbon, J. M. Effects of structurally related flavonoids on cell cycle progression of human melanoma cells: regulation of cyclin-dependent kinases CDK2 and CDK1. *Biochem. Pharmacol.* **61**, 1205–1215 (2001).
71. Hu, Y., Dragowska, W. H., Wallis, A., Duronio, V. & Mayer, L. Cytotoxicity induced by manipulation of signal transduction pathways is associated with down-regulation of Bcl-2 but not Mcl-1 in MCF-7 human breast cancer. *Breast Cancer Res. Treat.* **70**, 11–20 (2001).
72. Li, Y. & Sarkar, F. H. Inhibition of nuclear factor  $\kappa$ B activation in PC3 cells by genistein is mediated via Akt signaling pathway. *Clin. Cancer Res.* **8**, 2369–2377 (2002).
73. Gong, L., Li, Y., Nedeljkovic-Kurepa, A. & Sarkar, F. H. Inactivation of NF- $\kappa$ B by genistein is mediated via Akt signaling pathway in breast cancer cells. *Oncogene* **22**, 4702–4709 (2003).
74. Mouria, M. *et al.* Food-derived polyphenols inhibit pancreatic cancer growth through mitochondrial cytochrome c release and apoptosis. *Int. J. Cancer* **98**, 761–769 (2002).
75. Katdare, M., Osborne, M. & Telang, N. T. Soy isoflavone genistein modulates cell cycle progression and induces apoptosis in HER-2/neu oncogene expressing human breast epithelial cells. *Int. J. Oncol.* **21**, 809–815 (2002).
76. Po, L. S., Wang, T. T., Chen, Z. Y. & Leung, L. K. Genistein-induced apoptosis in MCF-7 cells involves changes in Bak and Bcl-x without evidence of anti-oestrogenic effects. *Br. J. Nutr.* **88**, 463–469 (2002).
77. Park, B. S. *et al.* Genistein-induced apoptosis of p815 mastocytoma cells is mediated by Bax and augmented by a proteasome inhibitor, lactacystin. *Nutr. Cancer* **42**, 248–255 (2002).
78. Brown, A., Jolly, P. & Wei, H. Genistein modulates neuroblastoma cell proliferation and differentiation through induction of apoptosis and regulation of tyrosine kinase activity and N-myc expression. *Carcinogenesis* **19**, 991–997 (1998).
79. Garcia de Veas, R., Schweigerer, L. & Medina, M. A. Modulation of the proteolytic balance plasminogen activator/plasminogen activator inhibitor by enhanced N-myc oncogene expression or application of genistein. *Eur. J. Cancer* **34**, 1736–1740 (1998).
80. Yu, L., Blackburn, G. L. & Zhou, J. R. Genistein and daidzein downregulate prostate androgen-regulated transcript-1 (PART-1) gene expression induced by dihydrotestosterone in human prostate LNCaP cancer cells. *J. Nutr.* **133**, 389–392 (2003).
81. Shao, Z. M., Shen, Z. Z., Fontana, J. A. & Barsky, S. H. Genistein's "ER-dependent and independent" actions are mediated through ER pathways in ER-positive breast carcinoma cell lines. *Anticancer Res.* **20**, 2409–2416 (2000).
82. Vissac-Sabatier, C., Bignon, Y. J. & Bernard-Gallon, D. J. Effects of the phytoestrogens genistein and daidzein on BRCA2 tumor suppressor gene expression in breast cell lines. *Nutr. Cancer* **45**, 247–255 (2003).
83. Verma, S. P., Goldin, B. R. & Lin, P. S. The inhibition of the estrogenic effects of pesticides and environmental chemicals by curcumin and isoflavonoids. *Environ. Health Perspect.* **106**, 807–812 (1998).
84. Fritz, W. A., Wang, J., Eltoum, I. E. & Lamartiniere, C. A. Dietary genistein down-regulates androgen and estrogen receptor expression in the rat prostate. *Mol. Cell Endocrinol.* **186**, 89–99 (2002).
85. Tacchini, L., Dansi, P., Matteucci, E. & Desiderio, M. A. Hepatocyte growth factor signal coupling to various transcription factors depends on triggering of Met receptor and protein kinase transducers in human hepatoma cells HepG2. *Exp. Cell Res.* **256**, 272–281 (2000).
86. Liu, Z. & Klominek, J. Regulation of matrix metalloproteinase activity in malignant mesothelioma cell lines by growth factors. *Thorax* **58**, 198–203 (2003).
87. Ahmed, N., Pansino, F., Baker, M., Rice, G. & Quinn, M. Association between  $\alpha$ 5 $\beta$ 1 integrin expression, elevated p42/44 kDa MAPK, and plasminogen-dependent matrix degradation in ovarian cancer. *J. Cell Biochem.* **84**, 675–686 (2002).
88. Sasamura, H. *et al.* Inhibitory effect on expression of angiogenic factors by antiangiogenic agents in renal cell carcinoma. *Br. J. Cancer* **86**, 768–773 (2002).
89. Gerhauser, C. *et al.* Mechanism-based in vitro screening of potential cancer chemopreventive agents. *Mutat. Res.* **523–524**, 163–72 (2003).
90. Ciolino, H. P. & Yeh, G. C. Inhibition of aryl hydrocarbon-induced cytochrome P-450 1A1 enzyme activity and CYP1A1 expression by resveratrol. *Mol. Pharmacol.* **56**, 760–767 (1999).
91. Dubuisson, J. G., Dyess, D. L. & Gaubatz, J. W. Resveratrol modulates human mammary epithelial cell O-acetyltransferase, sulfotransferase, and kinase activation of the heterocyclic amine carcinogen N-hydroxy-PhIP. *Cancer Lett.* **182**, 27–32 (2002).
92. Banerjee, S., Bueso-Ramos, C. & Aggarwal, B. B. Suppression of 7,12-dimethylbenz(a)anthracene-induced mammary carcinogenesis in rats by resveratrol: role of nuclear factor- $\kappa$ B, cyclooxygenase 2, and matrix metalloproteinase 9. *Cancer Res.* **62**, 4945–4954 (2002).
93. Li, Z. G. *et al.* Suppression of N-nitrosomethylbenzylamine (NMBA)-induced esophageal tumorigenesis in F344 rats by resveratrol. *Carcinogenesis* **23**, 1531–1536 (2002).
94. Subbaramaiah, K. *et al.* Resveratrol inhibits cyclooxygenase-2 transcription in human mammary epithelial cells. *Ann. NY Acad. Sci.* **889**, 214–223 (1999).
95. Subbaramaiah, K. *et al.* Resveratrol inhibits cyclooxygenase-2 transcription and activity in phorbol ester-treated human mammary epithelial cells. *J. Biol. Chem.* **273**, 21875–21882 (1998).
96. Ahmad, N., Adhmi, V. M., Afaq, F., Feyes, D. K. & Mukhtar, H. Resveratrol causes WAF-1/p21-mediated G(1)-phase arrest of cell cycle and induction of apoptosis in human epidermoid carcinoma A431 cells. *Clin. Cancer Res.* **7**, 1466–1473 (2001).
97. Adhmi, V. M., Afaq, F. & Ahmad, N. Involvement of the retinoblastoma (pRb)-E2F/DP pathway during antiproliferative effects of resveratrol in human epidermoid carcinoma (A431) cells. *Biochem. Biophys. Res. Commun.* **288**, 579–585 (2001).
98. Joe, A. K. *et al.* Resveratrol induces growth inhibition, S-phase arrest, apoptosis, and changes in biomarker expression in several human cancer cell lines. *Clin. Cancer Res.* **8**, 893–903 (2002).
99. Wolter, F., Akoglu, B., Clausnitzer, A. & Stein, J. Downregulation of the cyclin D1/Cdk4 complex occurs during resveratrol-induced cell cycle arrest in colon cancer cell lines. *J. Nutr.* **131**, 2197–203 (2001).
100. Manna, S. K., Mukhopadhyay, A. & Aggarwal, B. B. Resveratrol suppresses TNF-induced activation of nuclear transcription factors NF- $\kappa$ B, activator protein-1, and apoptosis: potential role of reactive oxygen intermediates and lipid peroxidation. *J. Immunol.* **164**, 6509–6519 (2000).
101. Surh, Y. J. *et al.* Resveratrol, an antioxidant present in red wine, induces apoptosis in human promyelocytic leukemia (HL-60) cells. *Cancer Lett.* **140**, 1–10 (1999).
102. Kuo, P. L., Chiang, L. C. & Lin, C. C. Resveratrol-induced apoptosis is mediated by p53-dependent pathway in Hep G2 cells. *Life Sci.* **72**, 23–34 (2002).
103. Zhou, H. B., Yan, Y., Sun, Y. N. & Zhu, J. R. Resveratrol induces apoptosis in human esophageal carcinoma cells. *World J. Gastroenterol.* **9**, 408–411 (2003).
104. Holmes-McNary, M. & Baldwin, A. S. Jr Chemopreventive properties of *trans*-resveratrol are associated with inhibition of activation of the I $\kappa$ B kinase. *Cancer Res.* **60**, 3477–3483 (2000).
105. Mahyar-Roemer, M., Kohler, H. & Roemer, K. Role of Bax in indole-3-carbinol-induced apoptosis of colorectal carcinoma cells. *BMC Cancer* **2**, 27 (2002).
106. Dorrie, J., Gerauer, H., Wachter, Y. & Zunino, S. J. Resveratrol induces extensive apoptosis by depolarizing mitochondrial membranes and activating caspase-9 in acute lymphoblastic leukemia cells. *Cancer Res.* **61**, 4731–4739 (2001).
107. She, Q. B., Bode, A. M., Ma, W. Y., Chen, N. Y. & Dong, Z. Resveratrol-induced activation of p53 and apoptosis is mediated by extracellular-signal-regulated protein kinases and p38 kinase. *Cancer Res.* **61**, 1604–1610 (2001).
108. She, Q. B., Huang, C., Zhang, Y. & Dong, Z. Involvement of c-jun NH(2)-terminal kinases in resveratrol-induced activation of p53 and apoptosis. *Mol. Carcinog.* **33**, 244–250 (2002).
109. Lin, H. Y. *et al.* Resveratrol induced serine phosphorylation of p53 causes apoptosis in a mutant p53 prostate cancer cell line. *J. Urol.* **168**, 748–755 (2002).
110. Asou, H. *et al.* Resveratrol, a natural product derived from grapes, is a new inducer of differentiation in human myeloid leukemias. *Int. J. Hematol.* **75**, 528–533 (2002).
111. Narayanan, B. A., Narayanan, N. K., Re, G. G. & Nixon, D. W. Differential expression of genes induced by resveratrol in LNCaP cells: p53-mediated molecular targets. *Int. J. Cancer* **104**, 204–212 (2003).
112. Kimura, Y. & Okuda, H. Resveratrol isolated from Polygonum cuspidatum root prevents tumor growth and metastasis to lung and tumor-induced neovascularization in Lewis lung carcinoma-bearing mice. *J. Nutr.* **131**, 1844–1849 (2001).
113. Jaiswal, A. K., Venugopal, R., Mucha, J., Carothers, A. M. & Grunberger, D. Caffeic acid phenethyl ester stimulates human antioxidant response element-mediated expression of the NAD(P)H:quinone oxidoreductase (NQO1) gene. *Cancer Res.* **57**, 440–446 (1997).
114. Zheng, Z. S., Xue, G. Z., Grunberger, D. & Prystowsky, J. H. Caffeic acid phenethyl ester inhibits proliferation of human keratinocytes and interferes with the EGF regulation of ornithine decarboxylase. *Oncol. Res.* **7**, 445–452 (1995).
115. Mahmoud, N. N. *et al.* Plant phenolics decrease intestinal tumors in an animal model of familial adenomatous polyposis. *Carcinogenesis* **21**, 921–927 (2000).
116. Chen, Y. J., Shiao, M. S., Hsu, M. L., Tsai, T. H. & Wang, S. Y. Effect of caffeic acid phenethyl ester, an antioxidant from propolis, on inducing apoptosis in human leukemic HL-60 cells. *J. Agric. Food Chem.* **49**, 5615–5619 (2001).
117. Nomura, M., Kaji, A., Ma, W., Miyamoto, K. & Dong, Z. Suppression of cell transformation and induction of apoptosis by caffeic acid phenethyl ester. *Mol. Carcinog.* **31**, 83–89 (2001).
118. Chen, Y. J., Shiao, M. S. & Wang, S. Y. The antioxidant caffeic acid phenethyl ester induces apoptosis associated with selective scavenging of hydrogen peroxide in human leukemic HL-60 cells. *Anticancer Drugs* **12**, 143–149 (2001).
119. Chiao, C. *et al.* Apoptosis and altered redox state induced by caffeic acid phenethyl ester (CAPE) in transformed rat fibroblast cells. *Cancer Res.* **55**, 3576–3583 (1995).
120. Weyant, M. J., Carothers, A. M., Bertagnoli, M. E. & Bertagnoli, M. M. Colon cancer chemopreventive drugs modulate integrin-mediated signaling pathways. *Clin. Cancer Res.* **6**, 949–956 (2000).
121. Balogun, E. *et al.* Curcumin activates the haem oxygenase-1 gene via regulation of Nrf2 and the antioxidant-responsive element. *Biochem. J.* **371**, 887–895 (2003).
122. He, Y. H. & Schut, H. A. Inhibition of DNA adduct formation of 2-amino-1-methyl-6-phenylimidazo[4,5-b]pyridine and 2-amino-3-methylimidazo[4,5-f]quinoline by dietary indole-3-carbinol in female rats. *J. Biochem. Mol. Toxicol.* **13**, 239–247 (1999).
123. Guo, D. *et al.* Protection by chlorophyllin and indole-3-carbinol against 2-amino-1-methyl-6-phenylimidazo[4,5-b]pyridine (PhIP)-induced DNA adducts and clonic aberrant crypts in the F344 rat. *Carcinogenesis* **16**, 2931–2937 (1995).
124. Sherratt, P. J. *et al.* Increased bioactivation of dihaloalkanes in rat liver due to induction of class  $\tau$  glutathione S-transferase T1-1. *Biochem. J.* **335**, 619–630 (1998).
125. Horn, T. L., Reichert, M. A., Bliss, R. L. & Malejka-Giganti, D. Modulations of P450 mRNA in liver and mammary gland and P450 activities and metabolism of estrogen in liver by treatment of rats with indole-3-carbinol. *Biochem. Pharmacol.* **64**, 393–404 (2002).
126. Ashok, B. T. *et al.* Abrogation of estrogen-mediated cellular and biochemical effects by indole-3-carbinol. *Nutr. Cancer* **41**, 180–187 (2001).
127. Chinni, S. R., Li, Y., Upadhyay, S., Koppolu, P. K. & Sarkar, F. H. Indole-3-carbinol (I3C) induced cell growth inhibition, G1 cell cycle arrest and apoptosis in prostate cancer cells. *Oncogene* **20**, 2927–2936 (2001).
128. Chinni, S. R. & Sarkar, F. H. Akt inactivation is a key event in indole-3-carbinol-induced apoptosis in PC-3 cells. *Clin. Cancer Res.* **8**, 1228–1236 (2002).
129. Howells, L. M., Gallacher-Horley, B., Houghton, C. E., Manson, M. M. & Hudson, E. A. Indole-3-carbinol inhibits protein kinase B/Akt and induces apoptosis in the human breast tumor cell line MDA MB468 but not in the nontumorigenic HBL100 line. *Mol. Cancer Ther.* **1**, 1161–1172 (2002).
130. Meng, Q. *et al.* Indole-3-carbinol is a negative regulator of estrogen receptor-alpha signaling in human tumor cells. *J. Nutr.* **130**, 2927–2931 (2000).
131. Meng, Q. *et al.* Suppression of breast cancer invasion and migration by indole-3-carbinol: associated with up-regulation of BRCA1 and E-cadherin/catenin complexes. *J. Mol. Med.* **78**, 155–165 (2000).
132. Meng, Q., Goldberg, I. D., Rosen, E. M. & Fan, S. Inhibitory effects of indole-3-carbinol on invasion and migration in human breast cancer cells. *Br. Cancer Res. Treat.* **63**, 147–152 (2000).
133. Guyonnet, D. *et al.* Antimutagenic activity of organosulfur compounds from Allium is associated with phase II enzyme induction. *Mutat Res.* **495**, 135–145 (2001).
134. Munday, R. & Munday, C. M. Relative activities of organosulfur compounds derived from onions and garlic in increasing tissue activities of quinone reductase and glutathione transferase in rat tissues. *Nutr. Cancer* **40**, 205–210 (2001).
135. Wu, C. C. *et al.* Differential effects of garlic oil and its three

- major organosulfur components on the hepatic detoxification system in rats. *J. Agric. Food Chem.* **50**, 378–383 (2002).
136. Maurya, A. K. & Singh, S. V. Differential induction of glutathione transferase isoenzymes of mice stomach by diallyl sulfide, a naturally occurring anticarcinogen. *Cancer Lett.* **57**, 121–129 (1991).
137. Hong, Y. S., Ham, Y. A., Choi, J. H. & Kim, J. Effects of allyl sulfur compounds and garlic extract on the expression of Bcl-2, Bax, and p53 in non small cell lung cancer cell lines. *Exp. Mol. Med.* **32**, 127–134 (2000).
138. Shukla, Y., Arora, A. & Singh, A. Antitumorigenic potential of diallyl sulfide in Ehrlich ascites tumor bearing mice. *Biomed. Environ. Sci.* **15**, 41–47 (2002).
139. Bowen, P. *et al.* Tomato sauce supplementation and prostate cancer: lycopene accumulation and modulation of biomarkers of carcinogenesis. *Exp. Biol. Med.* **227**, 886–893 (2002).
140. Bhuvaneshwari, V., Velmurugan, B., Balasenthil, S., Ramachandran, C. R. & Nagini, S. Chemopreventive efficacy of lycopene on 7,12-dimethylbenz[*a*]anthracene-induced hamster buccal pouch carcinogenesis. *Fitoterapia* **72**, 865–874 (2001).
141. Bhuvaneshwari, V., Velmurugan, B. & Nagini, S. Induction of glutathione-dependent hepatic biotransformation enzymes by lycopene in the hamster cheek pouch carcinogenesis model. *J. Biochem. Mol. Biol. Biophys.* **6**, 257–260 (2002).
142. Velmurugan, B., Bhuvaneshwari, V., Burra, U. K. & Nagini, S. Prevention of N-methyl-N'-nitro-N-nitrosoguanidine and saturated sodium chloride-induced gastric carcinogenesis in Wistar rats by lycopene. *Eur. J. Cancer Prev.* **11**, 19–26 (2002).
143. Breinholt, V., Lauridsen, S. T., Daneshvar, B. & Jakobsen, J. Dose-response effects of lycopene on selected drug-metabolizing and antioxidant enzymes in the rat. *Cancer Lett.* **154**, 201–210 (2000).
144. Nahum, A. *et al.* Lycopene inhibition of cell cycle progression in breast and endometrial cancer cells is associated with reduction in cyclin D levels and retention of p27(Kip1) in the cyclin E-cdk2 complexes. *Oncogene* **20**, 3428–3436 (2001).
145. Karas, M. *et al.* Lycopene interferes with cell cycle progression and insulin-like growth factor I signaling in mammary cancer cells. *Nutr. Cancer* **36**, 101–111 (2000).
146. Prakash, P., Russell, R. M. & Krinsky, N. I. *In vitro* inhibition of proliferation of estrogen-dependent and estrogen-independent human breast cancer cells treated with carotenoids or retinoids. *J. Nutr.* **131**, 1574–1580 (2001).
147. Nara, E., Hayashi, H., Kotake, M., Miyashita, K. & Nagao, A. Acyclic carotenoids and their oxidation mixtures inhibit the growth of HL-60 human promyelocytic leukemia cells. *Nutr. Cancer* **39**, 273–283 (2001).
148. Barcelo, S., Gardiner, J. M., Gescher, A. & Chipman, J. K. CYP2E1-mediated mechanism of anti-genotoxicity of the broccoli constituent sulforaphane. *Carcinogenesis* **17**, 277–282 (1996).
149. Singletary, K. & MacDonald, C. Inhibition of benzo[*a*]pyrene- and 1,6-dinitropyrene-DNA adduct formation in human mammary epithelial cells by dibenzoylmethane and sulforaphane. *Cancer Lett.* **155**, 47–54 (2000).
150. Bonnesen, C., Eggleston, I. M. & Hayes, J. D. Dietary indoles and isothiocyanates that are generated from cruciferous vegetables can both stimulate apoptosis and confer protection against DNA damage in human colon cell lines. *Cancer Res.* **61**, 6120–6130 (2001).
151. Matusheski, N. V. & Jeffery, E. H. Comparison of the bioactivity of two glucoraphanin hydrolysis products found in broccoli, sulforaphane and sulforaphane nitrile. *J. Agric. Food Chem.* **49**, 5743–5749 (2001).
152. Chiao, J. W. *et al.* Sulforaphane and its metabolite mediate growth arrest and apoptosis in human prostate cancer cells. *Int. J. Oncol.* **20**, 631–636 (2002).
153. Gamet-Payraastre, L. *et al.* Sulforaphane, a naturally occurring isothiocyanate, induces cell cycle arrest and apoptosis in HT29 human colon cancer cells. *Cancer Res.* **60**, 1426–1433 (2000).
